# Supplementary material
Source: Elsevier journal article supplement (http://www.ican.com.mo/pdf/mmc01.pdf)
Supplement: mmc01 [file mmc01.pdf]

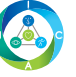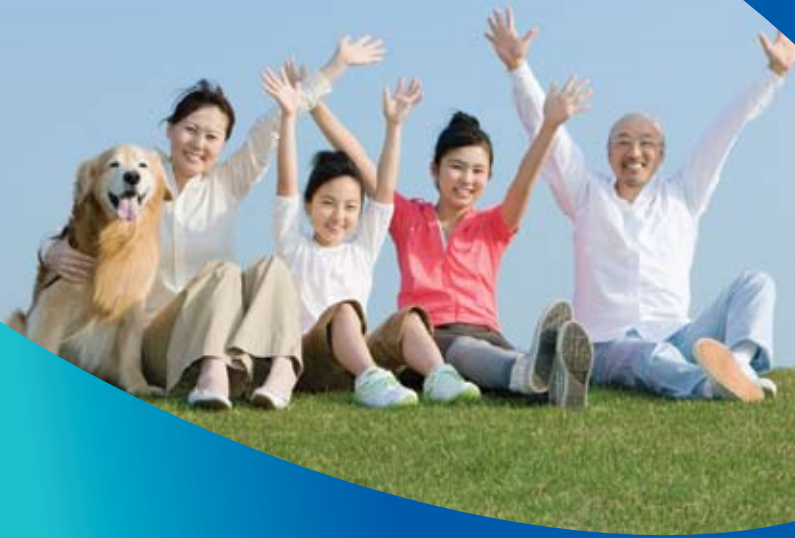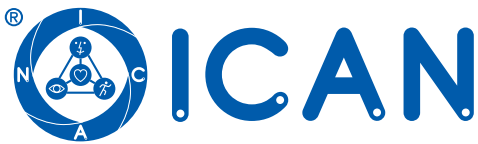

## 心理健康與力量證書課程 Mind Wellness and Power Certificate Course

你參加的不只是一個課程，更是一個協助你改變自己，提升心理健康與力量的過程！

由黃重光醫生設計並講授的ICAN心理健康與力量證書課程，及ICAN心理健康與力量深化課程，通過培訓學員掌握及實踐ICAN實踐心理學模式，增強個人心理健康與力量，改變自己及影響他人，活出成功、進步、快樂的100分人生！

有很多人.....

- 勤奮工作，但事業總是停滯不前
- 想有美滿家庭，卻不知怎樣與家人溝通和維繫良好關係
- 想做好父母，卻缺乏力量影響或改變子女
- 有不少朋友，卻沒有知己，心中感到寂寞
- 明白均衡生活的重要，卻身不由己，活得不健康和不快樂
- 想活得精彩，卻感到壓力重重，心力交瘁

也有很多人，在人生和事業上有不少成就，但.....

- 心中卻不快樂，感到困擾
- 對自己缺乏自信，心中不安
- 不能維繫良好人際關係，家人關係欠佳
- 感覺失落，缺乏人生方向

## 他們需要甚麼力量，才能改變自己？

他們需要心理力量改變自己，這個課程能夠幫助他們從「心」做起，發揮以下效能：

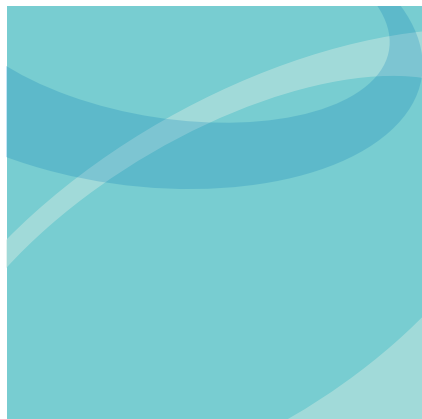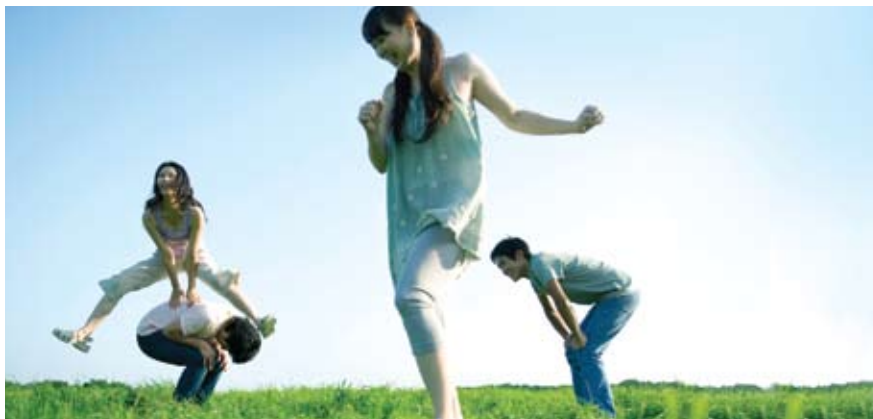

## 課程效能

### 個人方面

- 深入了解自己，達致「知己」的效果
- 了解心理困擾的原因和消除心中的不快樂
- 提升心理健康，增強抗壓能力和心理堅韌力
- 強化心理力量，更有能力主宰自己，活出快樂人生

### 家庭方面

- 了解家人，達致「知彼」的效果
- 掌握維繫良好家庭關係的技巧
- 了解導致家庭關係問題的核心原因和改善方法
- 掌握改變家人的心理方法，締造幸福家庭

### 工作方面

- 提升工作效能，令個人事業更成功
- 了解同事和僱員的心理
- 更有能力維繫良好人際關係，締造和諧職場
- 掌握影響同事及僱員的方法，提高工作效率，加強生產力

## 課程內容

課程共七節，包括六節實踐工作坊及一節分享工作坊。實踐工作坊由黃重光醫生以體驗學習形式(Experiential Learning)主持。黃醫生會通過心理素質評估、真人真事實例、個案分析、活動體驗及分享討論等，協助參加者深入體會和掌握提升心理健康與力量的要訣。黃醫生會鼓勵學員通過自我反思，使自己作出正向改變，提升心理健康與力量，在個人、工作、家庭三方面都能發揮更大效能，活出成功、進步、快樂的100分人生！

## 真人真事，學員的分享

**Erita (投資顧問助理)：**上ICAN課程之前，我雖然有家庭和工作，但是感覺人生是「零」，整個世界都是「黑」色的。學會ICAN，經過「自我反思」之後，將自己放回人生正中心。當我尋回「自我價值」後，看事情也更通透，感覺不再迷失，人生漸漸有了曙光。現在，我可以肯定說：我是快樂的。至於有甚麼會使我不快樂，我反而想不到。

**Eric (精神科護士長)：**我以前很有能力幫助病人，但當同樣的問題發生在自己身上時，卻沒有能力去幫自己。運用了ICAN模式之後，我不只更了解自己，而且真正有能力解決自己的問題，並且更有能力去幫助家人、朋友、同事和病人。

**Maggie (文員)：**我上了ICAN課程後，才醒覺到我過去的四十年彷彿如活在一個心靈黑洞裏，既不了解自己，也不知道怎樣幫助自己。現在的我呢，我覺得已經開始在黎明裏，快要天亮了，我正在找尋自己真正想走的路。明天的我呢，我知道我會活在陽光之下，我的前路是光明的！

**Johnny (大學教授)：**未上課程之前，我的心理素質比較低，很容易被外界的事情影響自己的心情，令情緒起伏很大。學習完課程之後，自覺凡事在掌握之內，感覺自主，這種感覺非常好。

更多課程學員的心聲分享，歡迎瀏覽：

[www.ican.com.hk/100/community](http://www.ican.com.hk/100/community)

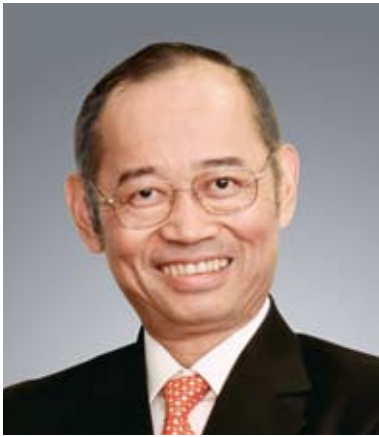

Dr Wong Chung-Kwong, JP  
MB BS MD FRCPsych FHKCpsych  
FHKAM (Psychiatry)  
香港大學內外全科醫學士  
香港中文大學醫學博士  
英國皇家精神科醫學院榮授院士  
香港精神科醫學院院士  
香港醫學專科學院院士  
全人教育基金主席  
前香港中文大學精神科學系教授  
兼系主任

## 黃重光醫生太平紳士 全人發展中心 榮譽顧問團主席

黃醫生創立了以科學為本、價值為基礎的<sup>ICAN</sup>實踐心理學模式，並在香港、澳門及國內積極推動提升成年人和兒童「心理素質」的培訓工作，為建構和諧社會國家作出努力，因而獲得中國公益事業發展大會頒授「中國文化教育業2007十大社會公益人物」、中國心理健康促進會授予「中國百名心理學傑出成就獎」、中國國際專業科學家學會授予「中國百名專業貢獻傑出人士金牛獎」、全國心理衛生協會授予「全國十大心理學功勳人物之星」、中國醫藥醫學開發合作促進會授予「中國百名醫學傑出人物終身成就獎」等多項榮譽。

中國國際權威專家協會更將其<sup>ICAN</sup>實踐心理學模式定為「中國醫學研究領域定點研究示範單位」、而<sup>ICAN</sup>模式也獲得由國家知識產權局主辦的中國國際專利與名牌博覽會頒發「金獎」榮譽。

在講學和訓練方面，黃醫生在過去三十多年來，積極訓練醫科學生和精神科專科醫生，他並為專業和非專業人士主講超過三千多個講座及研討會。他經常接受政府部門及工商業機構邀請，主講有關提升心理健康、壓力和危機處理、領袖和團隊訓練及有關溝通、輔導、紛爭與磋商技巧的講座和工作坊。

此外，黃醫生曾參與製作超過六百多個有關兒童、家庭和心理健康的電視節目，並曾在香港電台主講「父母之道」專題連播的節目長達十二年。

在著作方面，黃醫生在專業醫學雜誌刊登了六十多篇精神科醫學研究報告及專業文章，並為家長和兒童工作者撰寫了多個系列書籍。包括《<sup>ICAN</sup>》系列、《更美好的明天》系列、《成長路》系列、《成功父母自學教材》系列和《<sup>ICAN</sup>幼兒心理學故事叢書》。黃醫生並聯同資深專業全工，撰寫了《<sup>ICAN</sup>全人教育》中學及小學系列。而另一新著作《<sup>ICAN</sup>從心做起，活出100分人生！》亦已出版。

## ICAN 是甚麼？

ICAN是黃重光醫生根據精神科醫學和心理學、多年臨床工作經驗，及培訓醫學界、教育界和工商界等專業人士所得的經驗而創立的實踐心理學模式，目的是協助大家發揮更大的心理力量，使能一生活得成功、進步和快樂。此模式已經在香港、澳門和國內協助數以萬計的成年人和學生。

ICAN是由三個重點組成。重點一是「成功」。根據心理治療科學，心理是由「自我價值」、「觀察」、「情緒」和「行為」不斷互動所組成；在ICAN實踐心理學模式裏，我們稱之為「人格功能」(Personality Functioning)。成功的人能夠發揮「人格功能」四方面的心理力量，持守正確人生價值、戰勝挫折、考驗和誘惑，無論經歷甚麼逆境，仍能屹立不倒，並有力量追求正確的人生目標。

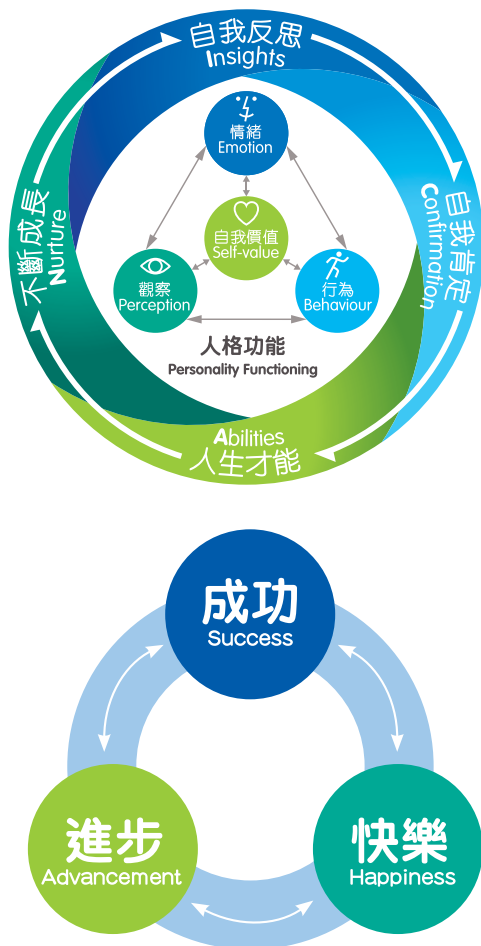

ICAN實踐心理學模式中三個重點的互動關係

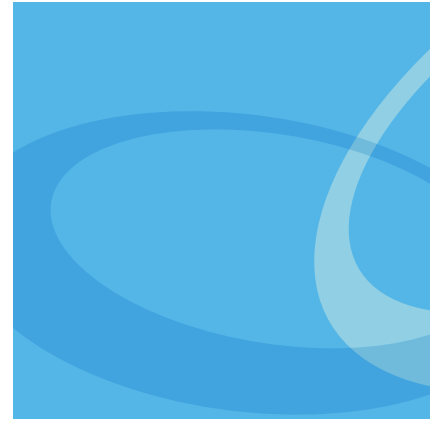

重點二是「進步」。根據動機心理學，人類最強的動機是發自內在的自主、醒覺和成功感。在ICAN實踐心理學模式裏，是由「I」Insights (自我反思)、「C」Confirmation (自我肯定)、「A」Abilities (人生才能)、「N」Nurture (不斷成長) 所組成循環不息的「自我賦權」過程。通過這個過程，我們能不斷推動自己進步和增值。

重點三是「快樂」。根據發展心理學，我們需要感情滿足，才會快樂和有生命力。在ICAN實踐心理學模式裏，通過「連繫」(Connect)，我們建立和維繫良好人際關係；通過「賦權」(Empower)，我們影響和改變別人。發揮「連繫」與「賦權」的作用，就有力量「愛己愛人」，活出快樂人生。

以上三個重點更是彼此不斷互動，能夠發揮正向「人格功能」力量的人，不只有能力「成功」，也是自主能力高，不斷自我賦權，達至「進步」。他們也有力量與別人維繫良好關係，因此得到「快樂」。換言之，「成功」、「進步」、「快樂」三者產生正面循環不息的互動作用。

實踐心理學模式涉及精神科醫學與心理學的三個重要範疇：心理治療科學、動機心理學和發展心理學。它們各有獨特的作用，幫助我們了解及提升人們的心理健康。ICAN實踐心理學模式汲取了它們的精髓，再通過把三者揉合和互動，使它們更容易被理解和應用，發揮更有效提升心理健康與力量的作用。
